# Supplementary material for: Awareness, consumption patterns, and perceived health risks of non-sugar sweeteners among healthcare students in southern India: A cross-sectional study
Source: Research Square preprint supplement (doi:10.21203/rs.3.rs-8681082/v1), 2026-01-29
Supplement: Supplementary file 1 [file 224477d74ee3d1d476b5c621.docx]

**Supplementary Table S1. Associates of consumption of NSS among the students (N=387)**

| **Variables** | **Category** | **Unadjusted odds ratio (95% CI)** | **Adjusted odds ratio (95% CI)** |
| --- | --- | --- | --- |
| Gender | Female | 1 | 1 |
| Male | 0.7 (0.4-1.1) | 0.7 (0.4-1.1) |
| Course | AHS | 1 | 1 |
| BDS | 0.6 (0.2-1.6) | 0.6 (0.2-1.7) |
| MBBS | 0.3 (0.1-0.7) | **0.3 (0.1-0.8)** |
| Place of stay | Hostel | 1 | - |
| With family | 0.7 (0.4-1.4) |
| Independent | 1.1 (0.6-1.9) |
| Awareness of different names of NSS | No | 1 | - |
| Yes | 0.9 (0.5-1.5) |
| Awareness of the approved FDA acceptable daily intake of NSS | No | 1 | 1 |
| Yes | 1.7 (0.9-3.1) | 1.5 (0.8-3.1) |
| Awareness regarding the side effects of NSS | No | 1 | - |
| Yes | 1.4 (0.9-2.1) |
| Belief that NSS a healthy alternative to natural sugar | Positive | 1 | - |
| Neutral | 1.3 (0.7-2.3) |
| Negative | 1.2 (0.7-1.9) |
| Recommending NSS to others | Unlikely | 1 | - |
| Neutral | 0.8 (0.5-1.4) |
| Likely | 0.7 (0.4-1.3) |
| Belief that the taste satisfaction of NSS is the same as natural sugars | Agree | 1 | - |
| Neutral | 0.8 (0.5-1.4) |
| Disagree | 1.1 (0.6-1.7) |
| Belief that clear labelling of NSS on products is important | Very unimportant | 1 | - |
| Unimportant | 0.4 (0.1-1.2) |
| **Neutral** | **0.4 (0.2-0.9)** |
| Important | 0.6 (0.3-1.3) |
| Very important | 0.5 (0.2-1.1) |
| Ever sought information regarding NSS | No | 1 | 1 |
| Yes | 1.7 (0.9-2.8) | 1.6 (0.8-2.8) |
| Ever discussed NSS with a healthcare professional | No | 1 | 1 |
| Yes | 1.8 (0.8-3.9) | 1.3 (0.5-2.9) |
| Noticed any side effects/impacts of NSS on health | No | 1 | - |
| Yes | 1.3 (0.7-2.1) |
| Nagelkerke’s R2=0.08, Chi square value, df, p value= 21.2, 6, <0.001, accuracy: 0.624; AUC=0.639 | | | |
